# Supplementary material for: A hemolytic pigment of Group B Streptococcus allows bacterial penetration of human placenta
Source: PubMed Central journal article supplement — J Exp Med. 2013 Jun 3;210(6):1265–81. doi: 10.1084/jem.20122753 (PMC3674703; doi:10.1084/jem.20122753), 2013-06-03
Supplement: supp_jem.20122753_JEM_20122753_sm.pdf [file supp_jem.20122753_JEM_20122753_sm.pdf]

SUPPLEMENTAL MATERIAL

Whidbey et al., <http://www.jem.org/cgi/content/full/jem.20122753/DC1>

Secondary structure  
 cyIE\_Streptococcus\_agalactiae\_5616224  
 RBTH\_07380\_Bacillus\_thuringiensis\_75758495  
 IEI\_05393\_Bacillus\_cereus\_401094120  
 Plar1\_010100001288\_Paenibacillus\_larvae\_167461194  
 Acet\_Protonibacterium\_jensenii\_253969528  
 HMPREF1003\_00400\_Protonibacterium\_sp.\_354605860  
 AAur\_2334\_Arthrobacter\_aurescens\_119963928  
 HMPREF0059\_01605\_Actinomyces\_viscosus\_326773207  
 KSE\_42400\_Kitasatospora\_setae\_311897617  
 ypeA\_Klebsiella\_pneumoniae\_152971308  
 STM2449\_Salmonella\_enterica\_16420989  
 ECO5101\_13549\_Escherichia\_coli\_320640947  
 pa1A\_Bacillus\_subtilis\_16080268(PDB:1t1qA)  
 Ta0374\_Thermoplasma\_acidophilum\_16081503(PDB:3fixC)  
 rfm1\_Salmonella\_enterica\_167677991(PDB:2cnsC)  
 SPP\_1971\_Streptococcus\_pneumoniae\_225857525(PDB:2179e)  
 consensus/90%

Secondary structure  
 cyIE\_Streptococcus\_agalactiae\_5616224  
 RBTH\_07380\_Bacillus\_thuringiensis\_75758495  
 IEI\_05393\_Bacillus\_cereus\_401094120  
 Plar1\_010100001288\_Paenibacillus\_larvae\_167461194  
 Acet\_Protonibacterium\_jensenii\_253969528  
 HMPREF1003\_00400\_Protonibacterium\_sp.\_354605860  
 AAur\_2334\_Arthrobacter\_aurescens\_119963928  
 HMPREF0059\_01605\_Actinomyces\_viscosus\_326773207  
 KSE\_42400\_Kitasatospora\_setae\_311897617  
 ypeA\_Klebsiella\_pneumoniae\_152971308  
 STM2449\_Salmonella\_enterica\_16420989  
 ECO5101\_13549\_Escherichia\_coli\_320640947  
 pa1A\_Bacillus\_subtilis\_16080268(PDB:1t1qA)  
 Ta0374\_Thermoplasma\_acidophilum\_16081503(PDB:3fixC)  
 rfm1\_Salmonella\_enterica\_167677991(PDB:2cnsC)  
 SPP\_1971\_Streptococcus\_pneumoniae\_225857525(PDB:2179e)  
 consensus/90%

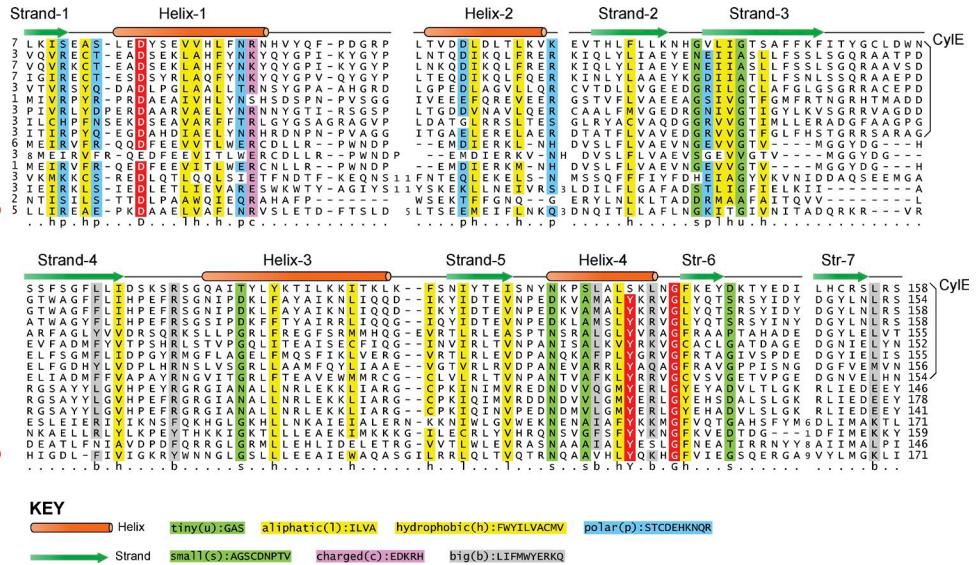

**Figure S1. Alignment of CylE to known N-acyltransferases.** Iterative sequence searches of GBS or *Streptococcus agalactiae* CylE using PSI-BLAST identified several homologues within the N acyltransferase superfamily and these sequences were aligned using Kalign. Secondary structure predictions show similar progression of secondary structure elements as known N-acyltransferases, further supporting the conclusion that CylE is an N-acyltransferase. Bracket denotes CylE homologues in organisms that also have genes of the Cyl operon.

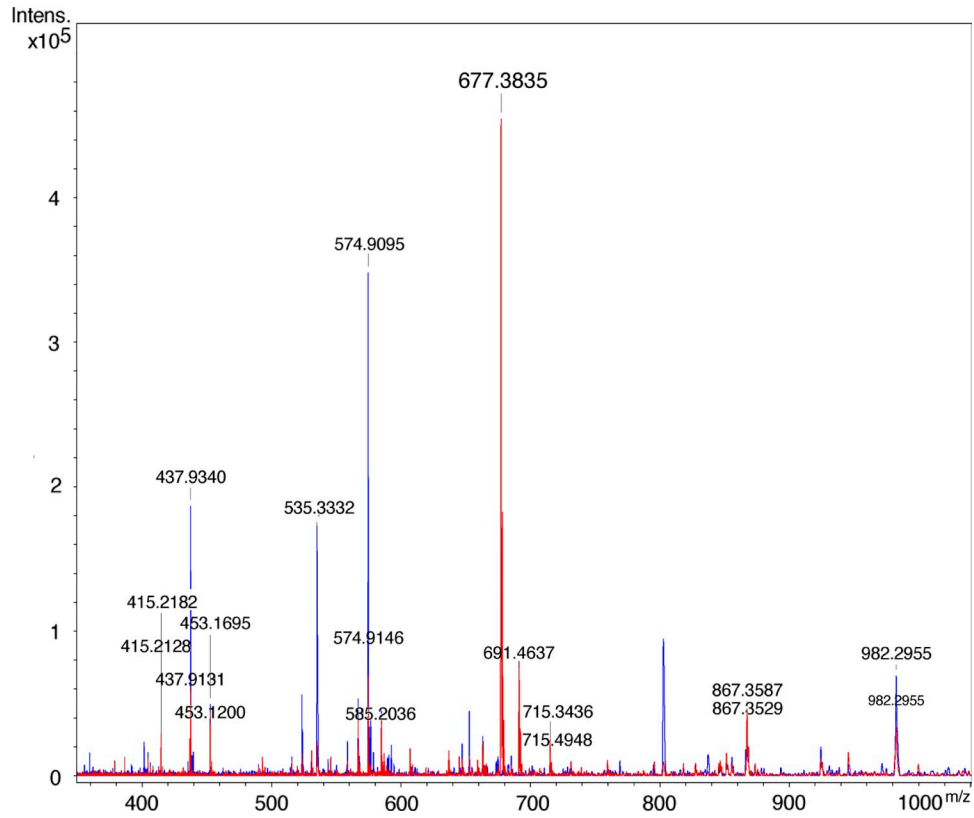

**Figure S2. Mass spectrometry confirms that the purified pigment with hemolytic activity is the GBS pigment previously identified as grana-daene.** Purified pigment from wild-type GBS dissolved in DMSO with 0.1% TFA was analyzed by Fourier transform ion cyclotron resonance mass spectrometry (FTICR-MS) and the spectrum is shown in red. The peak at 677.3835  $m/z$  corresponds to the full length pigment and the peak at 691.4637  $m/z$  corresponds to a methylated derivative. To control for possible contaminants, extraction was also performed on the nonhemolytic and nonpigmented sample from the  $\Delta cyIE$  strain (spectrum overlaid in blue). A comparison between the MS spectra revealed that the 677.3835  $m/z$  and 691.4637  $m/z$  are unique to the pigmented sample. Data shown are representative spectra from experiments performed on three independent pigment preparations and controls.

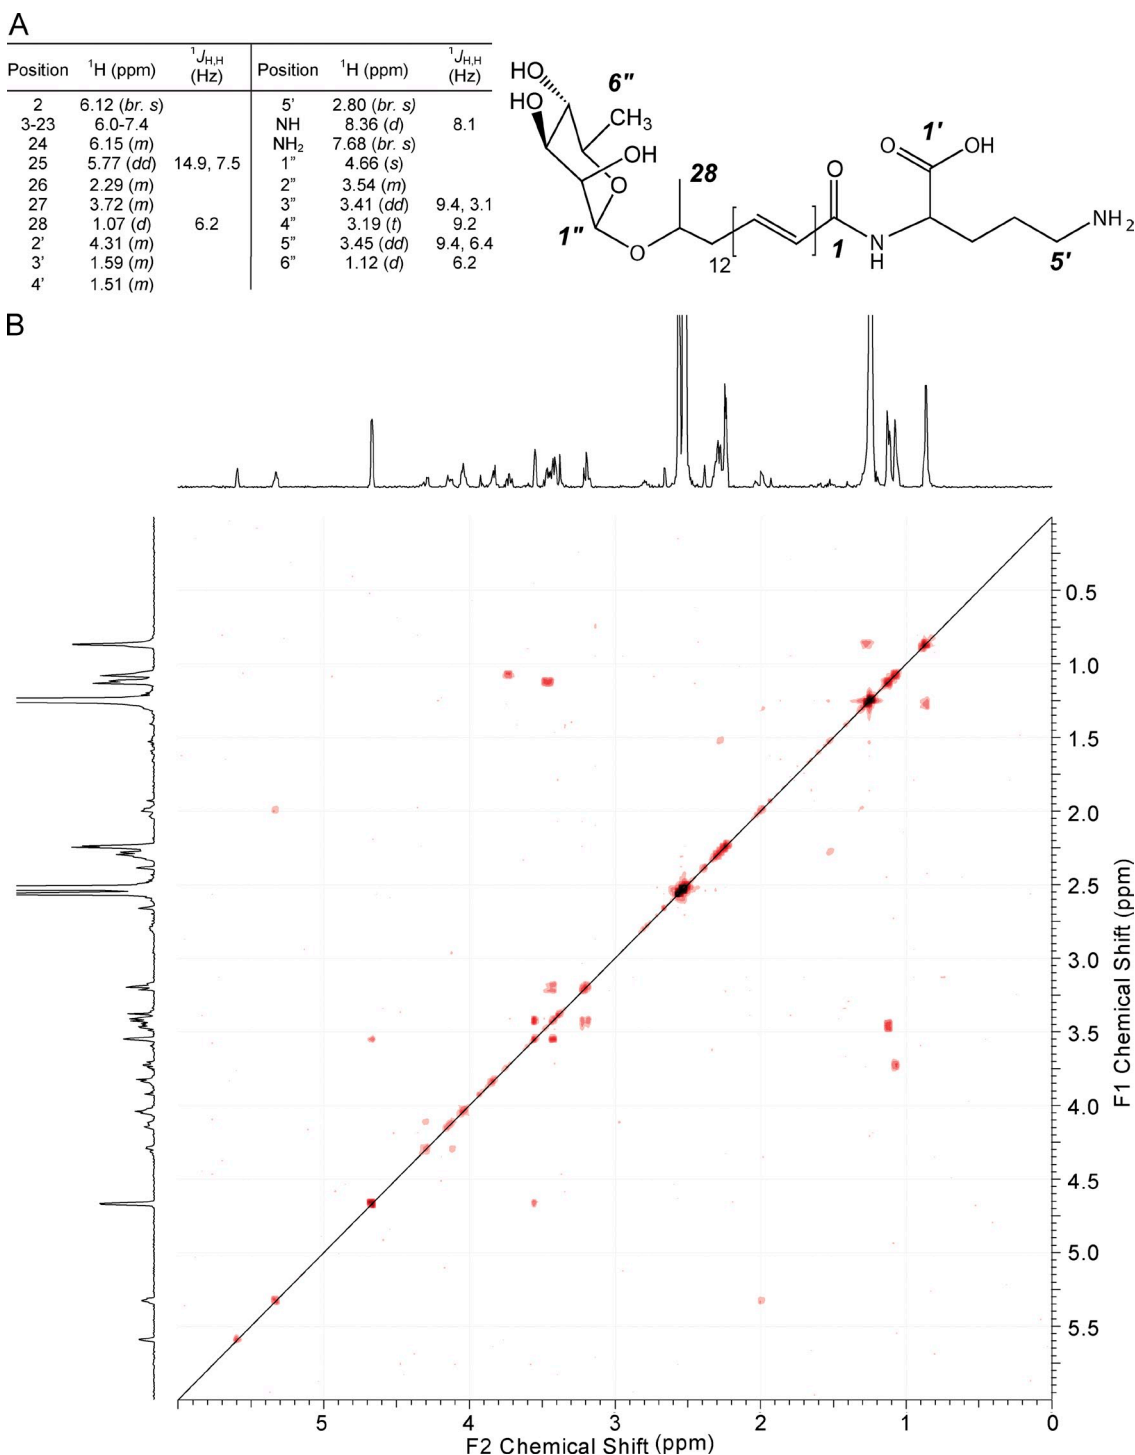

**Figure S3.** <sup>1</sup>H chemical shifts and <sup>1</sup>H-<sup>1</sup>H COSY NMR of the purified GBS pigment. The pigment from WT GBS or control extract from  $\Delta cy/E$  were dissolved in DMSO-*d*<sub>6</sub>; 0.1% *d*-TFA and analyzed by <sup>1</sup>H NMR and COSY at 298K on a Bruker AV-500 instrument. NMR was performed on two independent pigment preparations and controls. (A) <sup>1</sup>H shift assignments are listed. The broad peak from 6.4 to 6.8 ppm corresponds to the olefinic hydrogens present in the polyene; peaks at 7.68, 4.31, 1.62, 1.51, and 2.8 ppm correspond to hydrogens present in ornithine, whereas peaks at 4.66, 3.54, 3.41, 3.19, 3.46, and 1.12 ppm correspond to hydrogens on the rhamnose. Pigment structure is shown on the right. (B) The C27 hydrogen shift (3.73 ppm) corresponds to the ether linkage between rhamnose and C27. Likewise, the C2' hydrogen shift (4.31 ppm) suggests that ornithine is linked to the polyene by an amide bond at the  $\alpha$  carbon (C2'). Collectively, these results indicate that the hemolytic molecule purified from GBS is the ornithine rhamnolipid previously described as granadaene (Rosa-Fraile et al., 2006; Vanberg et al., 2007).

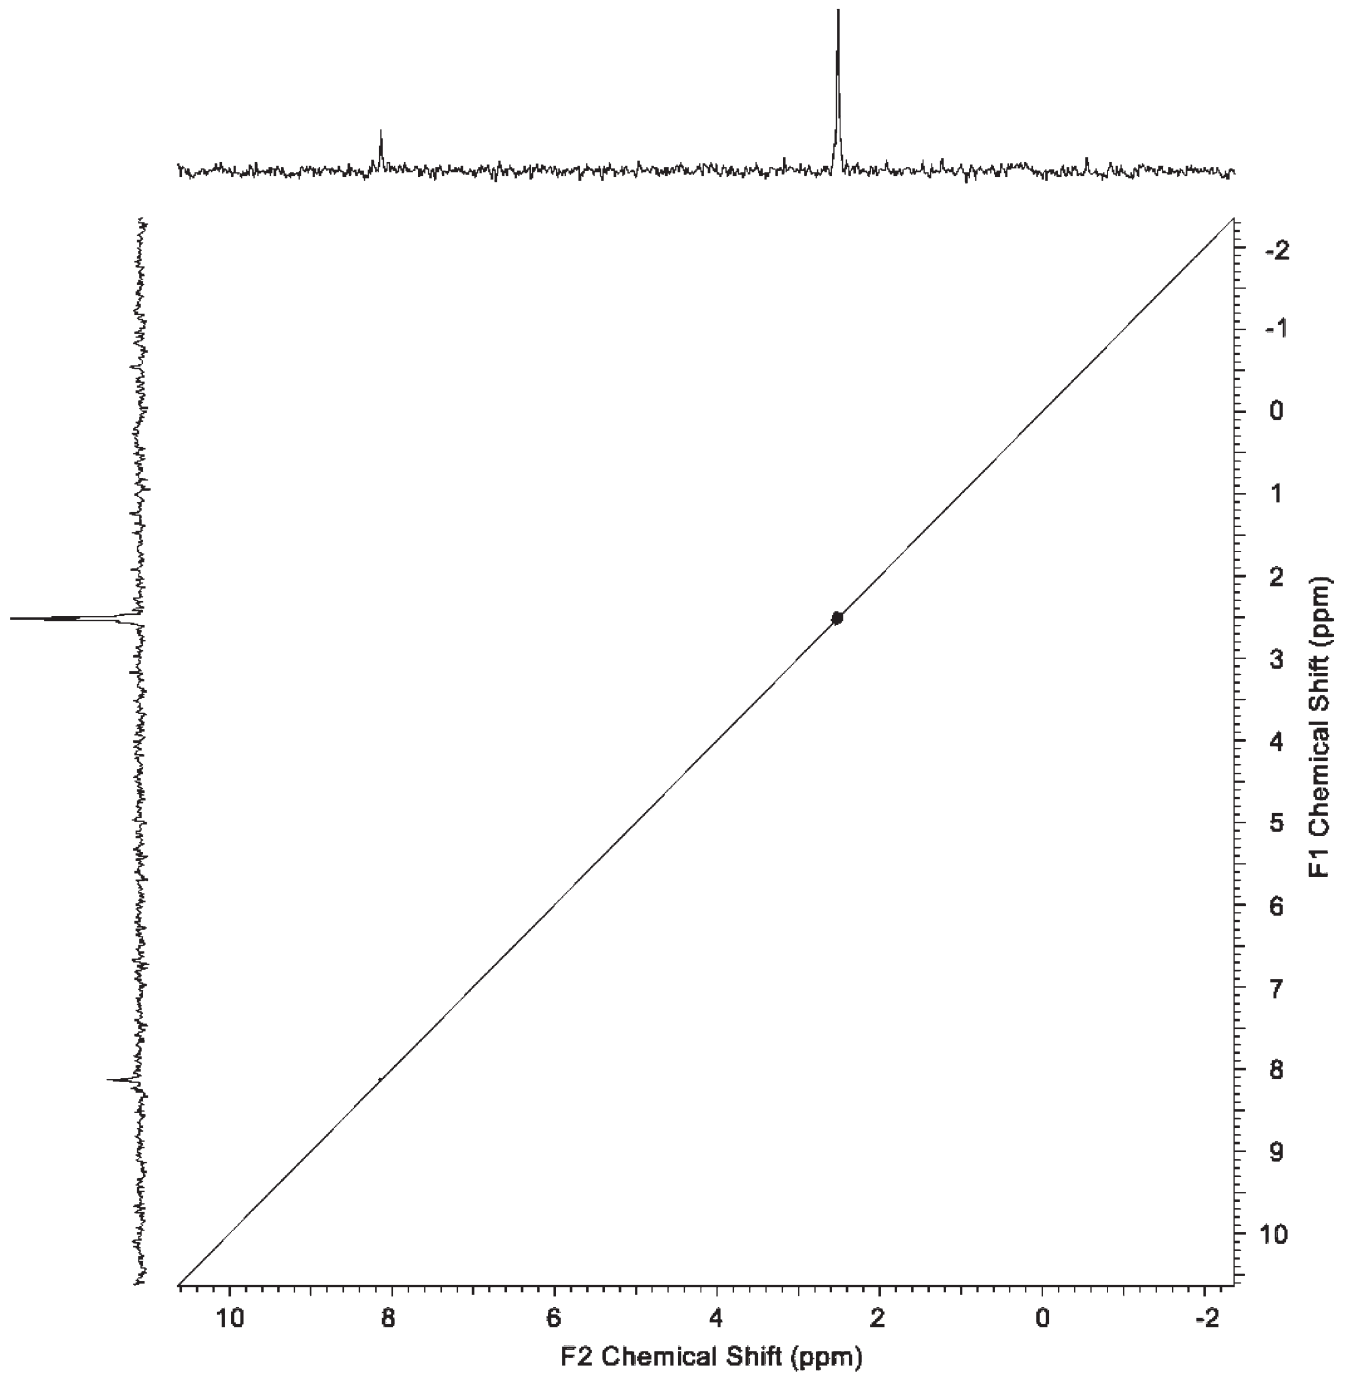

Figure S4. COSY analysis of the  $\Delta cyIE$  extract only shows peaks corresponding to residual DMSO (2.52 ppm) and TFA (8.13 ppm).

**Table S1.** Primers used in this study (listed 5'-3')

| Name            | Sequence                                            |
|-----------------|-----------------------------------------------------|
| CylEF           | TAGCGAATTCAGGAGGATGAAAGATGATAATAAATTAAG             |
| CylER           | TAGCGAATTCATGAAAGATGATAATAAATTAAG                   |
| CylABEF         | AAAAAA GAATTCAGGAGGATACATATGGAAATTAACCTCAAAAATATTGG |
| CylABER         | TTTTTTGGATCCCTGTTCTCAATGTATTATAAATAGTATTC           |
| dCylopupF       | AAAAATCTAGAAAGCTGGACCGTGCC                          |
| dCylopupR       | CACTGTTCTTGCAATATTATCACCTTCAAC                      |
| dcylkanF        | GTTGAAGGTGATAATATGCAAGGAACAGTG                      |
| dcylkanR        | GGAACAACATGTGCGAGTTGCGGATGTACTTCAG                  |
| dCylopdnF       | CTGAAGTACATCCGCAACTCGCAACATGTTGTCC                  |
| dCylopdnR       | TTTTTCTCGAGCAGTTTCACTTTTGACAACC                     |
| <i>qRTcylEL</i> | GGAAGTACCCGATTGAGCA                                 |
| <i>qRTcylER</i> | TGCCAGGAGGAGAATAGGAA                                |
| <i>rpsLF</i>    | TGCCCTTCGTAAATTTGCTC                                |
| <i>rpsLR</i>    | AACGTACCCCTGAAGGTCT                                 |
| IL6F            | GGAGACTTGCTGGTAAAA                                  |
| IL6R            | CAGGGGTGGTTATTGCATCT                                |
| IL8F            | AGCTCTGTGTGAAGGTGCAG                                |
| IL8R            | AATTTCTGTGTGGCGCAGT                                 |
| CXCL1F          | CTCTCCGCTCCTTCACAG                                  |
| CXCL1R          | GGGGACTTCACGTTCACT                                  |
| CCL20F          | GCGCAAATCAAAAACAGACT                                |
| CCL20R          | CAAGTCCAGTGAGGCACAAA                                |
| IL1bF           | TGGGCCTCAAAGGAAAAGA                                 |
| IL1bR           | GGTGCTGATGTACCAGTT                                  |
| GAPDHF          | GAAGGTGAAGGTCGGAGTCAACG                             |
| GAPDHR          | TCCTGGAAGATGGTATGGGAT                               |
| CovRF           | GCGCGGAGCTCTGTAAAGTAAAGAATAAG                       |
| CovR R          | GCGCGAGGATCCTTTATTTTTCACGAATCAC                     |
| CovS F          | GCGCGGAGCTCTATTCAAAGTTCGCGGAAT                      |
| CovS R          | GCGCGGATCCTTTATTTCTTTAGTTTCTT                       |
| CovS220F        | GTGCTACTAAGCGTATTGTTCCGGTTAAAATTTACACGAC            |
| CovS220R        | GTCGTGTAATTTTAACCGGACGAACAATACGCTTAGTAGCAC          |
| CovSV343MF      | CTTGGAACCTCATCAAGATGAAATGACAGATTTATCAAGCTC          |
| CovSV343MR      | GAGCTTGATAAATCTGTCAATTCATCTTGATGAAGTTCCAAG          |
| CovR/S F        | AAAAAA GGATCC GAGCTCGTTGATCAGGATTGGTC               |
| CovR/S R        | TTTTTTGGTACCACTAAAAGAGGCAATCTTCCAAACG               |
